# Supplementary material for: A Qualitative Approach to Extract Diagnostic Patterns of Cognitive Impairment in Parkinson’s Disease
Source: Research Square preprint supplement (doi:10.21203/rs.3.rs-7329834/v1), 2025-12-03
Supplement: Supplementary file 2 [file 728a9ae0029369a7a6e9608b.docx]

The following is the interview guide associated with Aim 1 of the study.

**Aim 1:** Will identify and characterize diagnostic patterns through think-aloud / talk-aloud observation.The 3 patient profiles will help guide the professionals in reciting patterns they look for when determining a diagnosis of Parkinson’s Disease with normal cognition, mild to moderate cognitive impairment, or dementia.

**Objective:** Explore how knowledge engineering can expand our accuracy and understanding of standard clinical practices and determine if there are explicit patterns in the relevant clinical data to be extracted.

**Roles:**

- **Interviewer/Proctor:** Study Principal Investigator
- **Interviewees:** Clinical neuropsychologists and neurologists specializing in Parkinson’s disease (PD).
- **Format:** The discussion will rely on the think-aloud / talk-aloud technique, the interviewer prompts the interviewee to describe their thoughts aloud. The interview will be centered around the process of diagnosing a patient with PD with normal cognition, mild to moderate cognitive impairment, or dementia.

**Consent Process:**

- **Proctor** begins by introducing themselves, the purpose of the study, and the nature of the interview (including recording/storage methods).
- **Interviewee** will have an opportunity to ask any questions and review interview consent sheet.
- **Proctor** will respond to questions (if any) and obtain verbal consent to continue.
- **Interviewee** provides verbal consent and interview begins. **NOTE:** No data to be collected for interviewees who decide not to proceed with the interview.

**Introduction of the Interview:**

- **Proctor** starts the recording and reiterates interviewee consent.
- **Proctor** begins by explaining the concept of the think-aloud / talk-aloud observation.
- **Proctor** then prompts the interviewee: “I would like you to walk me through your thought process on how you would diagnose this patient with PD with normal cognition, mild to moderate cognitive impairment or dementia. This interview will take 1 hour, and we will spend about 20 minutes on each model. We will start with the relevant clinical factors and then move to the MoCA.”
- **Interviewee** talks through their diagnostic thought processes and what they look for when categorizing a patient with PD normal cognition, mild to moderate cognitive impairment, or dementia.
- **Proctor** observes and makes notations of all observations of the interviewee.
- **Proctor** may pause interviewee to ask questions or request a repeat of any thoughts that require further clarification.

______________________________________________________________________________

**Interview Guide for Proctor:**

**Relevant factors:**

- What do you observe/look for in the patient history?
- What does this say about their cognition?

**MoCA:**

Visuospatial/Executive

- Line Connection:
- What do you observe/look for in the pattern of performance?
- What does this say about their cognition?
- Cube:
- What do you observe/look for in the pattern of performance? What are the lines doing?
- What does this say about their cognition?
- Clock:
- How would you describe the clock and the planning going into the background?
- How are the planning/execution?
- What do you look for when analyzing the clock?
- Axis of circle?
- Hands?
- Numbers?
- Overall:
- Looking across the tasks- analyze the performance: are there issues with execution within the domain and does that indicate something about planning and attention functionality?

Naming

- Animals
- What do you observe/look for in the pattern of performance?
- What does this say about their cognition?

Memory

- Do you take this into account on final diagnosis decision?
- What does that mean to you?

Attention

- Digits
- What do you observe/look for in the pattern of performance?
- What does this say about their cognition?
- Letters
- What do you observe/look for in the pattern of performance?
- What does this say about their cognition?
- Serial 7’s
- What do you observe in the pattern of serial 7’s?
- What does this say about their cognition?

Language

- Repeat
- What do you observe/look for in the pattern of performance?
- What does this say about their cognition?
- Fluency
- What do you observe/look for in the pattern of performance?
- What does this say about their cognition?

Abstraction

- Similarity between
- What do you observe/look for in the pattern of performance?
- What does this say about their cognition?

Delayed Recall

- (Bold the one that’s used) No cue; Category cue; Multiple choice cue-
- What do you observe/look for in the pattern of performance?
- What does this say about their cognition?

Orientation

- Scoring
- What do you observe/look for in the pattern of performance?
- What does this say about their cognition?

**Overall categorization of patient?**

Reasoning?
